# Supplementary material for: An adaptable in silico ensemble model of the arachidonic acid cascade
Source: Mol Omics. 2024 Jun 3;20(7):453–68. doi: 10.1039/d3mo00187c (PMC11318654; doi:10.1039/d3mo00187c)
Supplement: MO-020-D3MO00187C-s001 [file MO-020-D3MO00187C-s001.xlsx]

## Sheet: 46BR.1N PGE2
		[PGE2] (pg/106 cells)
	Time (h)	Ctrl			A23187+IND				Note: a value of 0.400 pg/106 cells was used if a peak was detectable in the mass spectrum, but was below the limit of quantification.
	0	0.4	0.4	0.4	0.4	0.4	0.4
	0.5	0.4	0.4	0.4	0.4	0.4	1.06015
	1	0.4	28.5538	0.4	0.4	0.4	1.48649
	3	8.54701	0.4	0.4	0.4	0.4	0.4
	6	14.9573	21.8353	0.4	0.4	0.4	0.4
	Time (h)	Ctrl			A23187				Note: a value of 4.000 pg/106 cells was used if a peak was detectable in the mass spectrum, but was below the limit of quantification.
	0	4	4	4	0	0	0
	0.5	4	4	4	14.698	4.23409	12.8479
	1	4	28.5538	4	28.0171	49.3782	29.649
	3	8.54701	4	4	64.1368	104.243	84.7075
	6	14.9573	21.8353	4	86.852	118.874	140.52
	Time (h)	Ctrl			ATP				Note: a value of 4.000 pg/106 cells was used if a peak was detectable in the mass spectrum, but was below the limit of quantification.
	0	4	4	4	0.08406	0.09639	4
	0.5	4	4	4	4	8.596	4
	1	4	4	3.59274	17.32	4	4
	3	8.54701	8.54701	4	17.129	4	4
	6	17.094	12.8205	20.1557	30.055	35.834	4
	Time (h)	Ctrl			UVR				Note: a value of 1.300 pg/106 cells was used if a peak was detectable in the mass spectrum, but was below the limit of quantification.
	0	1.3	1.3	1.3	1.3	1.3	1.3
	0.5	1.3	1.3	1.3	1.3	1.3	1.3
	1	1.3	1.3	1.3	1.3	3.05383	1.3
	3	1.3	1.3	1.3	8.54701	1.3	1.3
	6	3.45	2.16113	2.56515	14.9573	21.8353	1.3

## Sheet: 46BR.1N 12-HETE
		[12-HETE] (pg/106 cells)
	Time (h)	Ctrl			A23187+IND
	0	27.7778	58.0196	29.3864	4.1434	3	3		Note: a value of 6.000 pg/106 cells (Ctrl) or 3.000 pg/106 (A23187+IND) was used if a peak was detectable in the mass spectrum, but was below the limit of quantification.
	0.5	14.9573	90.2527	41.9912	22.6512	23.2081	28.5411
	1	49.1453	38.6797	6	115.768	197.886	160.236
	3	27.7778	25.7865	35.6422	225.728	142.867	114.173
	6	23.5043	45.1264	29.9974	1846.4	1175.52	1057.47
	Time (h)	Ctrl			A23187				Note: a value of 6.000 pg/106 cells was used if a peak was detectable in the mass spectrum, but was below the limit of quantification.
	0	27.7778	58.0196	29.3864	58.0196	10.0778	75.1107
	0.5	14.9573	90.2527	41.9912	57.9278	89.5243	63.2511
	1	49.1453	38.6797	6	51.0317	104.222	60.2862
	3	27.7778	25.7865	35.6422	114.476	165.687	97.8415
	6	23.5043	45.1264	29.9974	168.267	129.61	99.4067
	Time (h)	Ctrl			ATP				Note: a value of 6.000 pg/106 cells was used if a peak was detectable in the mass spectrum, but was below the limit of quantification.
	0	27.7778	58.0196	29.3864	23.4402	14.0806	15.8493
	0.5	14.9573	90.2527	41.9912	31.8024	11.6374	12.8061
	1	49.1453	38.6797	6	26.3723	19.5003	13.4973
	3	27.7778	25.7865	35.6422	26.8678	12.7003	12.4047
	6	23.5043	45.1264	29.9974	34.4454	15.04	26.818
	Time (h)	Ctrl			UVR				Note: a value of 6.000 pg/106 cells (Ctrl) or 7.000 pg/106 (UVR) was used if a peak was detectable in the mass spectrum, but was below the limit of quantification.
	0	27.7778	23.2078	29.3864	7	7	16.68
	0.5	14.9573	90.2527	41.9912	44.3032	52.5857	44.2444
	1	49.1453	38.6797	6	47.545	53.8683	35.5879
	3	27.7778	25.7865	35.6422	41.0615	56.4334	44.2444
	6	23.5043	45.1264	29.9974	14.0474	35.9122	21.1604

## Sheet: 46BR.1N 15-HETE
		[15-HETE] (pg/106 cells)
	Time (h)	Ctrl			A23187+IND				Note: a value of 1.000 pg/106 cells was used if a peak was detectable in the mass spectrum, but was below the limit of quantification.
	0	1.5	10.6838	8.39818	1	1	1
	0.5	6.90821	6.41026	2.42964	1	21.8396	12.5557
	1	21.4775	27.7778	8.39819	13.9616	13.4515	29.9602
	3	6.48835	12.8205	8.39819	59.538	97.6568	237.702
	6	8.87743	8.54701	2.42964	181.624	418.68	361.807
	Time (h)	Ctrl			A23187				Note: a value of 1.500 pg/106 cells (Ctrl), 2.500 pg/106 (A23187, 0 h) or 25.00 pg/106 (A23187, 1 h) was used if a peak was detectable in the mass spectrum, but was below the limit of quantification.
	0	1.5	10.6838	8.39818	2.5	12.0257	4.2149
	0.5	6.90821	6.41026	2.42964	28.9639	10.5171	19.766
	1	21.4775	27.7778	8.39819	55.1694	37.4132	25
	3	6.48835	12.8205	8.39819	113.097	66.8092	45.4617
	6	8.87743	8.54701	2.42964	154.474	113.576	69.1809
	Time (h)	Ctrl			ATP				Note: a value of 1.500 pg/106 cells (Ctrl) or 15.00 pg/106 (ATP) was used if a peak was detectable in the mass spectrum, but was below the limit of quantification.
	0	1.5	10.6838	8.39818	20.9411	18.6965	20.8575
	0.5	6.90821	6.41026	2.42964	15	5.1051	2.3847
	1	21.4775	27.7778	8.39819	8.21675	4.97965	6.1196
	3	6.48835	12.8205	8.39819	1.302	6.95785	4.65715
	6	8.87743	8.54701	2.42964	2.78175	1.50805	2.25135
	Time (h)	Ctrl			UVR				Note: a value of 1.000 pg/106 cells was used if a peak was detectable in the mass spectrum, but was below the limit of quantification.
	0	1	10.6838	8.39818	1	4.77351	8.39818
	0.5	6.90821	6.41026	2.17964	3.2417	20.5212	10.5802
	1	21.4775	27.7778	8.39819	10.8057	9.47804	1
	3	6.48835	12.8205	8.39819	3.2417	16.6735	4.80917
	6	8.87743	8.54701	2.17964	16.2085	1.78258	7.69467

## Sheet: HaCaT PGE2
		[PGE2] (pg/106 cells)
	Time (h)	Ctrl			A23187+IND				Note: a value of 1.500 pg/106 cells (Ctrl) or 20.00 pg/106 (A23187+IND) was used if a peak was detectable in the mass spectrum, but was below the limit of quantification.
	0	1.5	1.5	1.5	29.914	30.5135	20
	0.5	17.7349	46.1679	19.2538	43.137	39.556	20
	1	1.5	37.7885	11.0311	27.3278	30.2243	20
	3	1.5	4.89363	37.0026	7193.1	6982.45	20
	6	37.7672	58.4534	1.5	7361.13	7149.97	20
	Time (h)	Ctrl			A23187				Note: a value of 1.500 pg/106 cells was used if a peak was detectable in the mass spectrum, but was below the limit of quantification.
	0	1.5	1.5	1.5	0	12.3843	15.9801
	0.5	17.7349	46.1679	19.2538	507.752	486.645	809.387
	1	1.5	37.7885	11.0311	14230	13490	15390
	3	1.5	4.89363	37.0026	90640	88140	59960
	6	37.7672	58.4534	1.5	111400	146600	75380
	Time (h)	Ctrl			ATP				Note: a value of 1.500 pg/106 cells was used if a peak was detectable in the mass spectrum, but was below the limit of quantification.
	0	1.5	1.5	1.5	1.5	1.5	1.5
	0.5	17.7349	46.1679	19.2538	683.593	620.87	548.837
	1	1.5	37.7885	11.0311	799.407	915.683	832.27
	3	1.5	4.89363	37.0026	1047.87	759.808	692.807
	6	37.7672	58.4534	1.5	1010.85	920.629	1115.71
	Time (h)	Ctrl			UVR				Note: a value of 1.500 pg/106 cells was used if a peak was detectable in the mass spectrum, but was below the limit of quantification.
	0	1.5	1.5	1.5	606.859	1.5	1.5
	0.5	17.7349	46.1679	19.2538	1.5	1.5	1.5
	1	1.5	37.7885	11.0311	137.789	68.5046	1.5
	3	1.5	4.89363	37.0026	1.5	1.5	1.5
	6	37.7672	58.4534	1.5	5910.28	11090	1.5

## Sheet: HaCaT 12-HETE
		[12-HETE] (pg/106 cells)
	Time (h)	Ctrl			A23187+IND				Note: a value of 0.2880 pg/106 cells was used if a peak was detectable in the mass spectrum, but was below the limit of quantification.
	0	0.288	0.288	0.288	0.288	0.288	0.288
	0.5	127.388	78.7739	68.916	0.288	12.439	8.8725
	1	70.4422	0.288	25.3959	133.604	135.918	153.746
	3	83.4836	12.2249	6.45452	18710	19020	16030.4
	6	12.647	15.1227	0.288	61300	51460	71650
	Time (h)	Ctrl			A23187				Note: a value of 0.2880 pg/106 cells was used if a peak was detectable in the mass spectrum, but was below the limit of quantification.
	0	0.288	0.288	0.288	3.87947	4.09739	11.3309
	0.5	127.388	78.7739	68.916	22.7145	9.76005	26.0033
	1	70.4422	0.288	25.3959	387.491	279.904	422.347
	3	83.4836	12.2249	6.45452	5244.32	5532.86	3841.16
	6	12.647	15.1227	0.288	7379.7	8742.97	5348.08
	Time (h)	Ctrl			ATP				Note: a value of 1.000 pg/106 cells was used if a peak was detectable in the mass spectrum, but was below the limit of quantification.
	0	1	1	1	1	1	1
	0.5	6.43975	7.26287	2.03689	1	78.7739	68.916
	1	5.49003	3.14228	6.4524	70.4422	1	25.3959
	3	6.54087	3.00509	1	83.4836	12.2249	6.45452
	6	3.48072	1	2.25067	13.147	15.1227	1
	Time (h)	Ctrl			UVR				Note: a value of 3.500 pg/106 cells was used if a peak was detectable in the mass spectrum, but was below the limit of quantification.
	0	3.5	3.5		3.5	3.5	3.5
	0.5	127.388	78.7739		89.8365	311.883	3.5		Note: experimental issues occured when generating repeat 3 of the Ctrl time course and the UVR 6 h timepoint, so these values were excluded from analysis.
	1	70.4422	1.925		179.791	211.512	3.5
	3	83.4836	12.2249		155.88	151.754	3.5
	6	14.397	15.1227		944.924	588.447

## Sheet: HaCaT 15-HETE
		[15-HETE] (pg/106 cells)
	Time (h)	Ctrl			A23187+IND				Note: a value of 2.302 pg/106 cells was used if a peak was detectable in the mass spectrum, but was below the limit of quantification.
	0	2.30186	2.30186	2.30186	2.30186	1.15093	2.30186
	0.5	12.352	13.8047	21.4638	2.30186	84.537	2.30186
	1	20.7528	2.30186	11.102	52.3638	41.9745	68.3469
	3	18.3858	4.03072	2.3014	68890	53820	43510
	6	2.30186	1.65719	1.15093	140800	91660	84180
	Time (h)	Ctrl			A23187				Note: a value of 2.302 pg/106 cells was used if a peak was detectable in the mass spectrum, but was below the limit of quantification.
	0	2.30186	2.30186	2.30186	3.9087	4.60234	2.63975
	0.5	12.352	13.8047	21.4638	144.788	135.583	209.424
	1	20.7528	2.30186	11.102	3553.4	3418.94	5178.09
	3	18.3858	4.03072	2.3014	43530	49090	32780
	6	2.30186	1.65719	1.15093	48800	73440.4	44979.8
	Time (h)	Ctrl			ATP				Note: a value of 2.000 pg/106 cells was used if a peak was detectable in the mass spectrum, but was below the limit of quantification.
	0	2	2	2	2	2	2
	0.5	5.38981	2	2	12.352	13.6537	21.4638
	1	6.43962	2	2	20.7528	1	11.102
	3	1.3461	2	2	10.9294	4.03072	2.15047
	6	2	2	2	2	2.65719	2
	Time (h)	Ctrl			UVR				Note: a value of 2.302 pg/106 cells was used if a peak was detectable in the mass spectrum, but was below the limit of quantification.
	0	2.30186	2.30186	2.30186	2.30186	2.30186	2.30186
	0.5	12.352	13.8047	21.4638	37.0443	80.9247	2.30186
	1	20.7528	2.30186	11.102	74.8089	62.4965	2.30186
	3	18.3858	4.03072	2.3014	85.7105	87.3457	2.30186
	6	2.30186	1.65719	1.15093	837.967	458.938	2.30186
