# Supplementary material for: An adaptable in silico ensemble model of the arachidonic acid cascade
Source: PubMed Central journal article supplement (PMC11318654; doi:10.1039/d3mo00187c), 2024-06-03

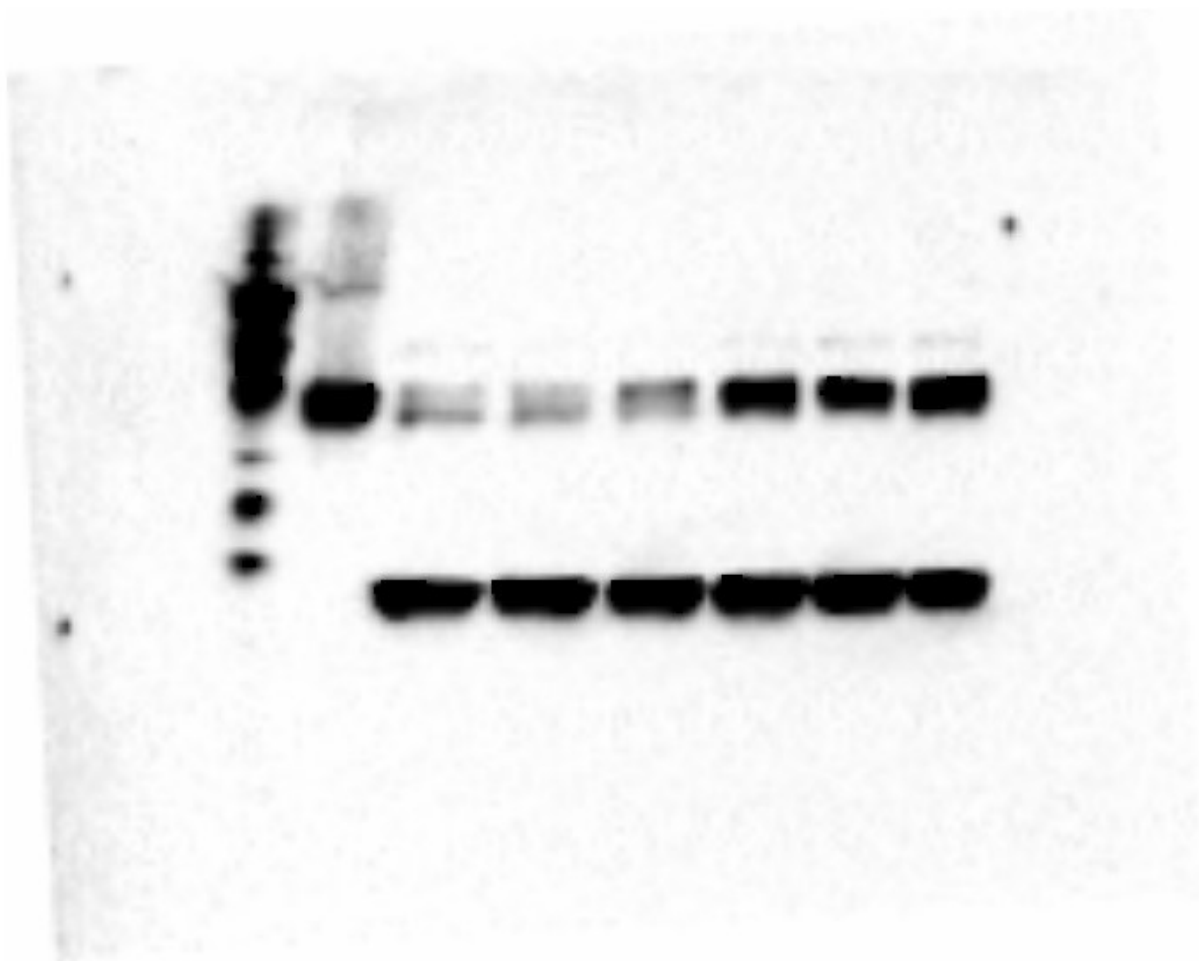

Supplement: MO-020-D3MO00187C-s003.pdf [file MO-020-D3MO00187C-s003.pdf]
